# Supplementary material
Source: JCI journal article supplement (doi:10.1172/jci98306)
Supplement: sd1 [file 1]

**Supplementary Table 1. Clinical characteristics of animals included in the study.**

|                                                        | <b>IA Saline (Ctrl<br/>n=16)</b> | <b>IA LPS 16h<br/>(n=13)</b> | <b>IA LPS+rIL-1ra<br/>16h (n=6)</b> | <b>IA LPS 48h<br/>(n=8)</b> |
|--------------------------------------------------------|----------------------------------|------------------------------|-------------------------------------|-----------------------------|
| <b>Maternal age, year <math>\pm</math> SD</b>          | 10 $\pm$ 2.1                     | 7 $\pm$ 1.8                  | 8.5 $\pm$ 2.6                       | 9.9 $\pm$ 2.6               |
| <b>Maternal weight (Kg)</b>                            | 8.9 $\pm$ 1.5                    | 8.3 $\pm$ 1.7                | 10.3 $\pm$ 1.2                      | 9.2 $\pm$ 0.8               |
| <b>Median GA at delivery,<br/>days [range]</b>         | 131 [128-136]                    | 132 [128-137]                | 132 [128-138]                       | 132 [126-137]               |
| <b>Mean birth weight, gram <math>\pm</math><br/>SD</b> | 332.3 $\pm$ 27.2                 | 323.6 $\pm$ 36.9             | 353.9 $\pm$ 32.1                    | 319.3 $\pm$ 46.5            |
| <b>Fetal gender number (F/M)</b>                       | 8/8                              | 9/4                          | 3/3                                 | 1/7                         |

**Supplementary Table 2. Clinical characteristics of pregnant women who delivered preterm newborns.**

|                                                    | <b>Preterm chorio negative (n=16)</b> | <b>Preterm chorio positive (n=14)</b> | <b>P value</b> |
|----------------------------------------------------|---------------------------------------|---------------------------------------|----------------|
| <b>Maternal age, year <math>\pm</math> SD</b>      | 28.3 $\pm$ 2.67                       | 29 $\pm$ 7.07                         | 0.8            |
| <b>Median GA at delivery, weeks [range]</b>        | 32.3 [26.6-35.4]                      | 31.4 [29.1-34]                        | 0.9            |
| <b>Causes of preterm birth</b>                     |                                       |                                       |                |
| • <b>PTL or preterm-PROM</b>                       | 8/16                                  | 12/14                                 | 0.06           |
| • <b>Pre-eclampsia</b>                             | 3/16                                  | 2/14                                  | 1.0            |
| • <b>Other indications</b>                         | <b>5/16</b>                           | <b>0/14</b>                           | <b>0.04</b>    |
| <b>Antenatal steroid use</b>                       | 11/16                                 | 12/14                                 | 0.4            |
| <b>Antenatal antibiotics use</b>                   | <b>4/16</b>                           | <b>10/14</b>                          | <b>0.03</b>    |
| <b>Cesarean delivery</b>                           | 10/16                                 | 6/14                                  | 0.5            |
| <b>The presence of labor</b>                       | 8/16                                  | 12/14                                 | 0.06           |
| <b>Spontaneous labor</b>                           | 5/8                                   | 9/12                                  | 0.6            |
| <b>Neonatal male gender</b>                        | 7/16                                  | 8/14                                  | 0.7            |
| <b>Mean birth weight, gram <math>\pm</math> SD</b> | 1690 $\pm$ 617                        | 1880 $\pm$ 375                        | 0.2            |
| <b>White Caucasian race</b>                        | 7/16                                  | 9/14                                  | 0.3            |
| <b>African-American race</b>                       | 9/16                                  | 5/14                                  | 0.3            |

PTL=preterm labor; PIH=pregnancy induced hypertension; HTN=hypertension

**P<0.05 between comparators by Fisher's exact test**

**Supplementary Table 3. List of monoclonal Antibodies used to phenotype chorio-decidual cells by flow cytometry.**

| <b>mAb</b>   | <b>Sample</b> | <b>Manufacturer</b> | <b>Clone</b> | <b>Conjugation</b>              |
|--------------|---------------|---------------------|--------------|---------------------------------|
| CD45         | Rhesus        | BDBioscience        | D058-1283    | PE-CF594                        |
| CD45         | Human         | BDBioscience        | HI30         | PE-CF594                        |
| HLA-DR       | Rhesus/Human  | Biologend           | L243         | Brilliant Violet<br>570/APC-Cy7 |
| CD3          | Rhesus        | BDBioscience        | SP34-2       | APC-Cy7                         |
| CD3          | Human         | BDBioscience        | UCHT1        | V500                            |
| CD14         | Rhesus        | Thermofisher        | TUK4         | Pacific Blue                    |
| CD14         | Human         | Biologend           | M5E2         | Alexa Fluor 488                 |
| CD56         | Rhesus/Human  | BDBioscience        | NCAM16.2     | PE-Cy7                          |
| CD88         | Rhesus        | AbD Serotec         | P12/1        | Alexa Fluor 647                 |
| CD66b        | Human         | BDBioscience        | GF105        | Alexa Fluor 647                 |
| CD19         | Rhesus/Human  | Biologend           | HIB19        | FITC                            |
| CD20         | Rhesus/Human  | Biologend           | 2H7          | FITC                            |
| CD16         | Rhesus        | BDBioscience        | 3G8          | Alexa Fluor 700                 |
| CD63         | Rhesus/Human  | Biologend           | H5C6         | Pacific Blue                    |
| CD8 $\alpha$ | Rhesus        | eBioscience         | RPA-T8       | eFluor 605                      |
| FOXP3        | Rhesus        | eBioscience         | PCH101       | eFluor 450                      |
| TNF $\alpha$ | Rhesus/Human  | BDBioscience        | Mab11        | Alexa Fluor 700                 |
| Live/Dead    | Rhesus/Human  | Thermofisher        |              | Aqua                            |
| Annexin V    | Rhesus/Human  | BDBioscience        |              | FITC                            |
| 7aad         | Rhesus/Human  | BDBioscience        |              | 7aad                            |

**Supplementary Table 4. List of Rhesus and Human Taqman probes**

**(ThermoFisher Scientific).**

|                  |               |
|------------------|---------------|
| <i>IL1B</i>      | Rh02621711_m1 |
| <i>IL6</i>       | Rh02789322_m1 |
| <i>IL8</i>       | Rh02789781_m1 |
| <i>MCP1/CCL2</i> | Rh02621753_m1 |
| <i>TNFA</i>      | Rh02789783_m1 |
| <i>IL10</i>      | Rh00961619_m1 |
| <i>IFNG</i>      | Rh02621721_m1 |
| <i>IDO1</i>      | Rh02841203_m1 |
| <i>CXCL10</i>    | Rh02788357_m1 |
| <i>CSF3</i>      | Rh02825033_m1 |
| <i>S100A8</i>    | Rh02913929_m1 |
| <i>CSF3R</i>     | Rh01114426_m1 |
| <i>BCL2A1</i>    | AIAAZ7T       |
| <i>MCL1</i>      | Rh02879361_m1 |
| <i>IDO1</i>      | Hs00984148_m1 |
| <i>IL6</i>       | Hs00985639_m1 |
| <i>TNFA</i>      | Hs99999043_m1 |
| <i>CXCL10</i>    | Hs00171042_m1 |
| <i>BCLXL</i>     | Hs00236329_m1 |
| <i>MCL1</i>      | Hs01050896_m1 |
| <i>BAD</i>       | Hs00188930_m1 |
| <i>BAX</i>       | Hs00180269_m1 |
| <i>BCL2</i>      | Hs00608023_m1 |
| <i>BCL2A1</i>    | Hs03405590_m1 |

### Supplementary Figure 1.

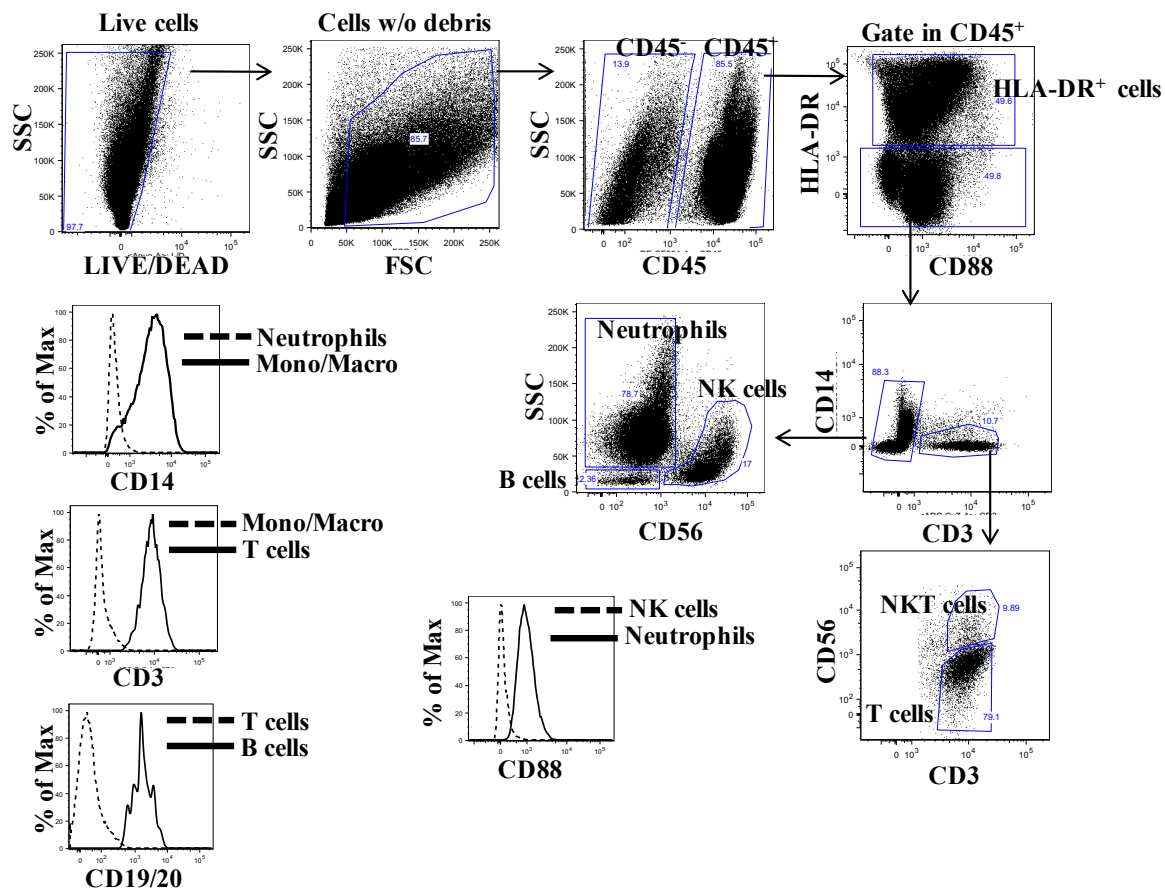

**Supplementary Figure 1. Representative gating strategy (n=13) used to characterize the different leukocyte subpopulations in Rhesus chorio-decidua as well as to separate neutrophils and CD45<sup>+</sup> cells by FACS sorter.** Live cells were first identified by the absence of LIVE/DEAD stain and forward-/side-scatter expression, excluding cell debris. Leukocytes were gated as CD45<sup>+</sup> cells. Inside the CD45<sup>+</sup> cells, the leukocyte subpopulations were gated as monocytes/macrophages (CD3<sup>-</sup>CD14<sup>high</sup>CD88<sup>+</sup>HLA-DR<sup>+</sup>); neutrophils (CD3<sup>-</sup>CD14<sup>low</sup>HLADR<sup>-</sup>CD88<sup>+</sup>CD56<sup>-</sup>); NK cells (CD3<sup>-</sup>CD14<sup>-</sup>HLA-DR<sup>-</sup>CD88<sup>-</sup>CD56<sup>+</sup>); B cells (CD3<sup>-</sup>CD14<sup>-</sup>CD56<sup>-</sup>CD19/CD20<sup>+</sup>); T cells (CD14<sup>-</sup>CD56<sup>-</sup>CD3<sup>+</sup>); and NKT cells (CD14<sup>-</sup>CD3<sup>+</sup>CD56<sup>+</sup>). HLA-DR<sup>+</sup> cells are mostly CD14<sup>+</sup> monocytes/macrophages, but they also contain some CD19/CD20<sup>+</sup> B cells. A similar gating strategy was used to characterize human cells, with the only difference that CD66b was used instead of CD88 for neutrophils (not shown).

**Supplementary Figure 2.**

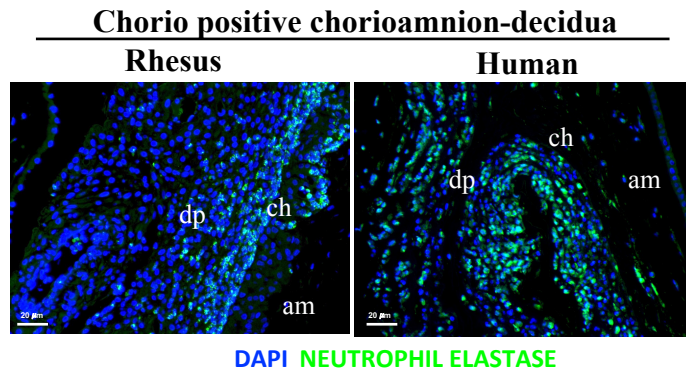

**Supplementary Figure 2. Neutrophil recruitment at the maternal-fetal interface is similar both in Rhesus and human in the setting of chorioamnionitis (chorio).** Representative immunostaining of Neutrophil Elastase (n=5) in fetal membranes of chorio<sup>+</sup> samples (am=amnion; ch=chorion; dp=decidua parietalis).

Supplementary Figure 3.

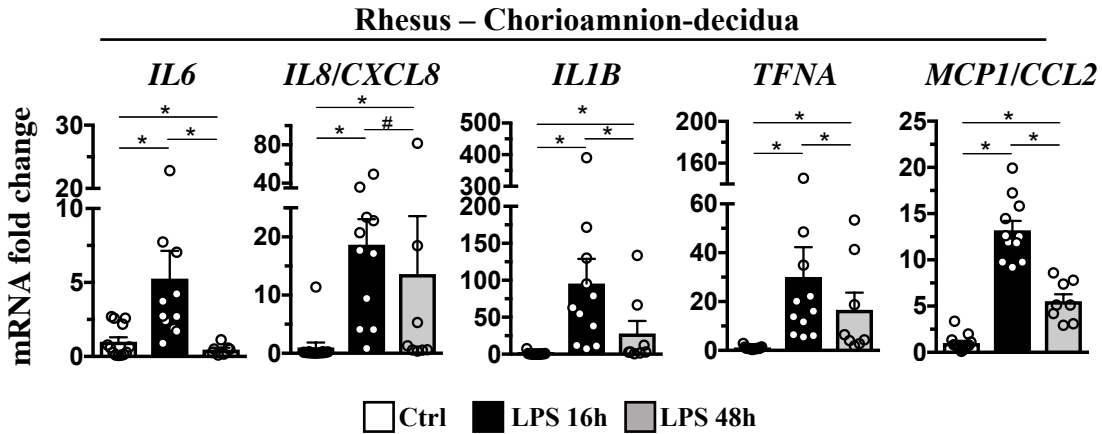

**Supplementary Figure 3. Time-course of inflammation induced by IA-LPS injection in chorioamnion-decidua.** Intra-amniotic injection of LPS induced a robust inflammation at 16 hours with a subsequent decrease at 48 hours. Histograms represent cytokine mRNAs in the chorioamnion-decidua (CAD) expressed as fold increases over the average value for controls after internally normalizing to the housekeeping 18S RNA. (Ctrl n=13; LPS16h n=11; LPS48h n=8). (Data are mean, SEM. \*p<0.05 between comparators; #0.1<p>0.05 between comparators by Mann-Whitney test).

## Supplementary Figure 4.

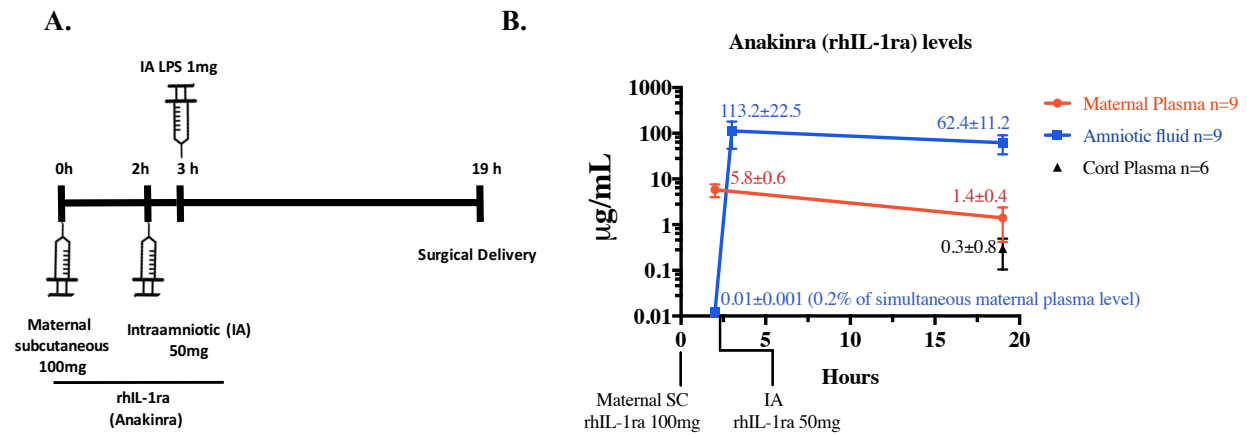

**Supplementary Figure 4. Experimental Schema and Anakinra Pharmacokinetics (A)** Schematic of dosing regimen in ~130d Rhesus macaques (80% gestation). **(B)** Pharmacokinetics of Anakinra measured by human IL-1ra specific bead-based ELISA. Note the low (0.2%) diffusion of Anakinra from maternal blood to Amniotic fluid (AF) 2h after maternal Subcutaneous (SC) before the AF Anakinra dosing. Also note the slower clearance of Anakinra from the AF compared to maternal plasma. There was a substantial transfer of Anakinra (19h level) to fetal plasma reflecting trans-placental transfer.

Supplementary Figure 5.

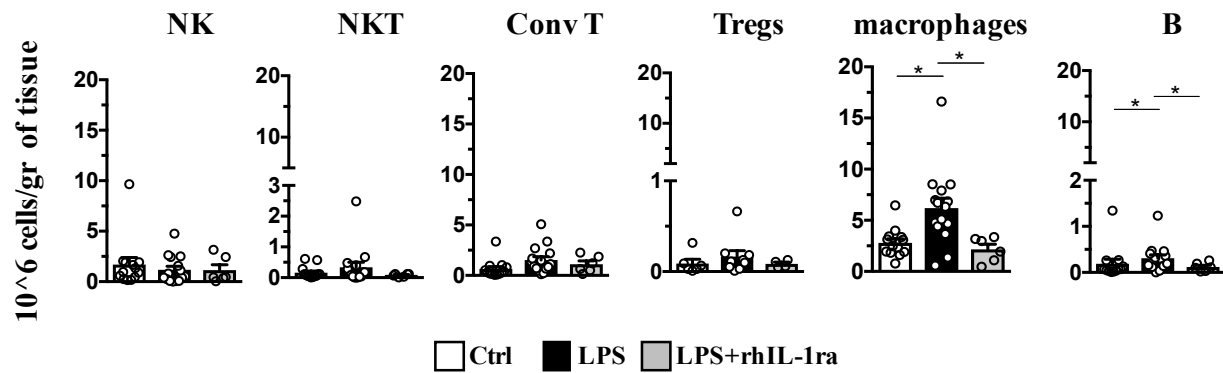

**Supplementary Figure 5. IA LPS slightly increased monocyte/macrophage and B-cells in the chorio-decidua in an IL-1 dependent manner.** Chorio-decidua cell suspensions were analyzed by multiparameter flow cytometry. IA LPS exposure increased only the number of chorio-decidua monocytes/macrophages and B cells compared to the control animals and rhIL-1ra reverted monocyte/macrophage and B cell numbers to control levels. LPS had no impact on NK, NKT, conventional T-cell or Treg (defined as CD3<sup>+</sup>CD8<sup>-</sup>FOXP3<sup>+</sup> cells) numbers (Ctrl n=11; LPS n=12; LPS+rhIL-1ra n=6) (Data are mean, SEM, \*p<0.05 between comparators by Mann-Whitney test).

Supplementary Figure 6.

A.

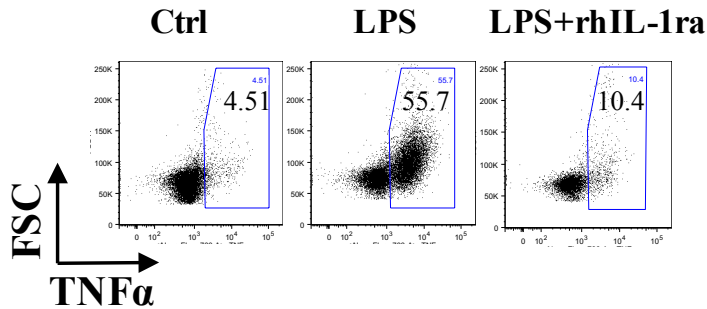

B.

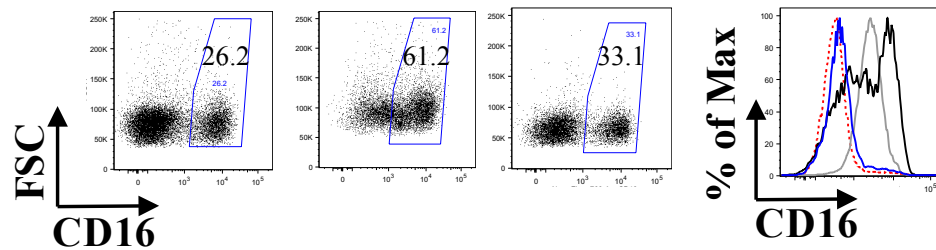

C.

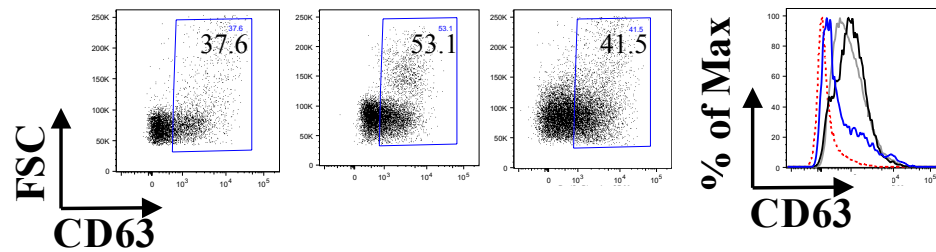

--- LPS Biologically negative population (T cells)  
 --- Ctrl  
 --- LPS+IL-1ra  
 --- LPS

Supplementary Figure 6. Representative dot plots (n=5) showing activation of chorio-decidua neutrophils. Chorio-decidua cell suspension were analyzed by flow cytometry. Frequency of (A) TNF $\alpha^+$ , (B) CD16 $^+$ , and (C) CD63 $^+$  neutrophils decreased upon rhIL-1ra treatment.

Supplementary Figure 7.

Human

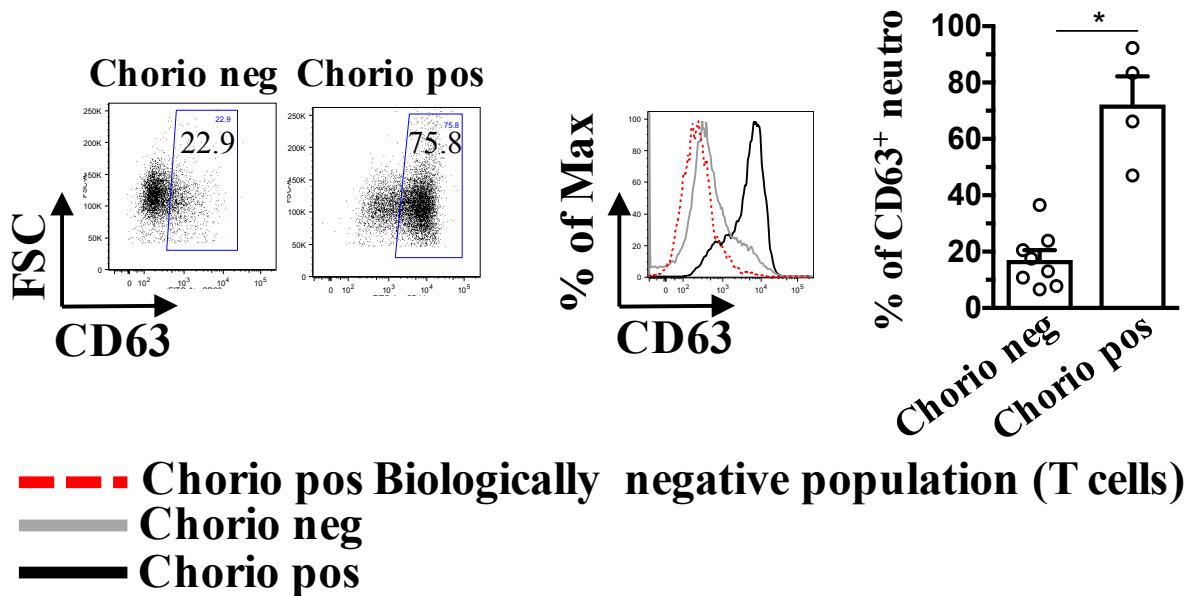

**Supplementary Figure 7. Increased CD63 expression in chorio-decidua neutrophils during human chorioamnionitis.** Similarly to Rhesus, human chorio-decidua neutrophils from pre-term chorioamnionitis positive samples (n=4) express higher CD63 compared to neutrophils from pre-term chorio negative samples (n=9). (Data are mean, SEM, \*p<0.05 between comparators by Mann-Whitney Test).

Supplementary Figure 8.

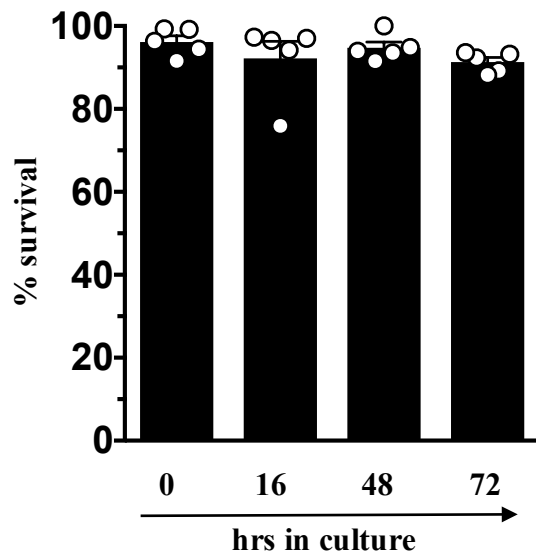

**Supplementary Figure 8. Chorio-decidua neutrophil survival over 3 days.** Chorio-decidua cells isolated from IA LPS-exposed animals ( $n=5$ ) were cultured without any stimulation for the time indicated. Chorio-decidua neutrophil survival (Annexin V<sup>-</sup>/7aad<sup>-</sup>) was assessed by flow cytometry. There was minimal loss of survival over 72h of culture (Data are mean, SEM).

## Supplementary Figure 9.

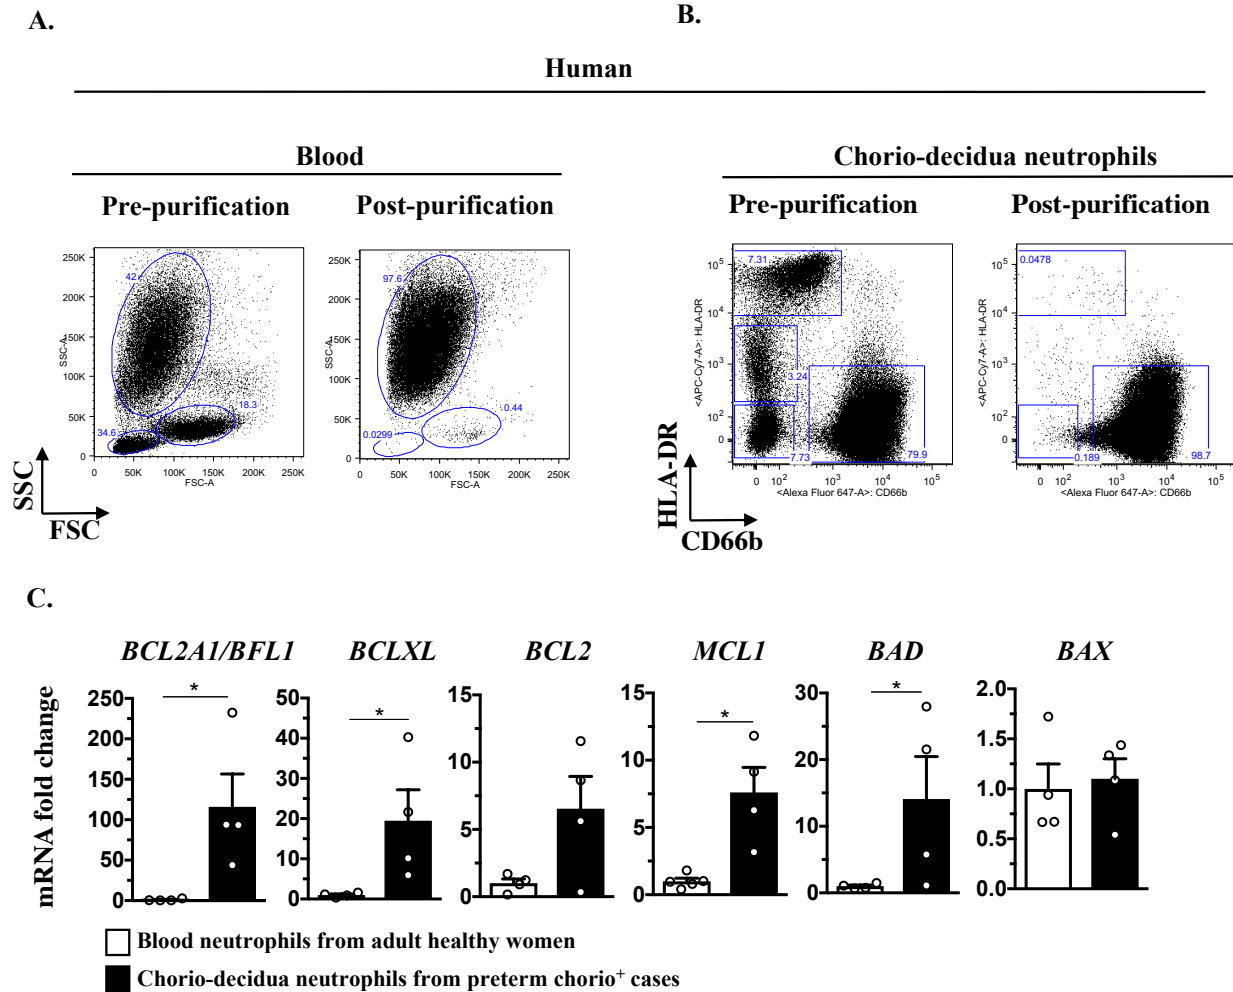

**Supplementary Figure 9. Chorioamnionitis induced expression of the pro-survival factor *Bcl2A1/Bfl1* in human chorio-decidua neutrophils** (A) Representative dot plots showing pre- and post-purification of human peripheral blood neutrophils. (B) Chorio-decidua neutrophils from human preterm chorioamnionitis positive membranes were isolated by CD66b<sup>+</sup> selection. Dot plots represent chorio-decidua cells pre-isolation and post-isolation (similar results were obtained by negative selection, not shown). (C) Human immuno-magnetic bead purified chorio-decidua neutrophils from preterm chorioamnionitis positive cases showed a significant increase of anti-apoptotic *Bcl2A1/Bfl1*, *Bcl-xl*, and *Mcl-1*, and pro-apoptotic *Bad* compared to blood neutrophils from adult healthy women. (Data are mean, SEM, \*p<0.05 between comparators by Mann-Whitney test).

## Supplementary Figure 10.

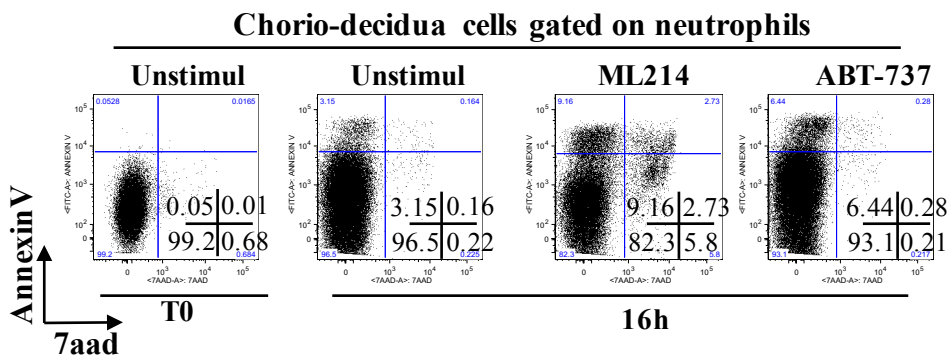

**Supplementary Figure 10. Gating strategy for detecting apoptosis in neutrophils.** Representative dot plots ( $n=5-14$ ) showing higher frequency of apoptosis in chorio-decidea cells gated on neutrophils isolated from IA LPS-exposed animals. Neutrophils cultured with ML214 ( $5\mu\text{M}$ ) had more neutrophils in the upper left + upper right + lower right quadrants while ABT-737 ( $0.1\mu\text{M}$ ) did not impact chorio-decidea neutrophil apoptosis.
